# Supplementary material
Source: PubMed Central journal article supplement (PMC9639704)
Supplement: NIHMS1844450-supplement-Appendix.pdf [file NIHMS1844450-supplement-Appendix.pdf]

# Appendix

|                                                                                                                                                                                                                                                          |    |
|----------------------------------------------------------------------------------------------------------------------------------------------------------------------------------------------------------------------------------------------------------|----|
| Appendix A.....                                                                                                                                                                                                                                          | 3  |
| Exhibit A1. STROBE Statement–Checklist of items that should be included in reports of cross-sectional studies .....                                                                                                                                      | 3  |
| Exhibit A2. Selected cause of death categories and ICD-10 codes included in each category. ....                                                                                                                                                          | 6  |
| Exhibit A3. Proportion of men and women (18+) with low, middle and high educational attainment as indicator of socioeconomic status in the United States between 2000 and 2018. ....                                                                     | 7  |
| Exhibit A4. Age-standardized mortality rates among men (18+) in the United States between 2000 and 2018 by cause of death, sex, and educational attainment as indicator of socioeconomic status (SES). Standardized to population counts in 2018. ....   | 8  |
| Exhibit A5. Age-standardized mortality rates among women (18+) in the United States between 2000 and 2018 by cause of death, sex, and educational attainment as indicator of socioeconomic status (SES). Standardized to population counts in 2018. .... | 9  |
| Exhibit A6. Cause-specific contributions (in years) to annual changes in life expectancy among US adult men and women by educational attainment as an indicator of socioeconomic status 2000-2018. ....                                                  | 10 |
| Appendix B.....                                                                                                                                                                                                                                          | 12 |

Exhibit B1. Population counts and crude, cause-specific mortality rates per 100,000 population by sex, educational attainment, and year. .... 13

Exhibit B2. Cause-specific contributions (in years) to annual changes in life expectancy at age 18 among US adult men and women by educational attainment as an indicator of socioeconomic status, 2000-2018. Low education = high school degree or less; middle education = some college but no college degree; and high education = college degree or more. .... 18

## Appendix A

### Exhibit A1. STROBE Statement–Checklist of items that should be included in reports of cross-sectional studies

|                              | Item No | Recommendation                                                                                                                                                                       | Page No |
|------------------------------|---------|--------------------------------------------------------------------------------------------------------------------------------------------------------------------------------------|---------|
| <b>Title and abstract</b>    | 1       | (a) Indicate the study's design with a commonly used term in the title or the abstract                                                                                               | 2       |
|                              |         | (b) Provide in the abstract an informative and balanced summary of what was done and what was found                                                                                  | 2       |
| <b>Introduction</b>          |         |                                                                                                                                                                                      |         |
| Background/rationale         | 2       | Explain the scientific background and rationale for the investigation being reported                                                                                                 | 5       |
| Objectives                   | 3       | State specific objectives, including any prespecified hypotheses                                                                                                                     | 5–6     |
| <b>Methods</b>               |         |                                                                                                                                                                                      |         |
| Study design                 | 4       | Present key elements of study design early in the paper                                                                                                                              | 6       |
| Setting                      | 5       | Describe the setting, locations, and relevant dates, including periods of recruitment, exposure, follow-up, and data collection                                                      | 6–7     |
| Participants                 | 6       | (a) Give the eligibility criteria, and the sources and methods of selection of participants                                                                                          | 6–7     |
| Variables                    | 7       | Clearly define all outcomes, exposures, predictors, potential confounders, and effect modifiers. Give diagnostic criteria, if applicable                                             | 8       |
| Data sources/<br>measurement | 8*      | For each variable of interest, give sources of data and details of methods of assessment (measurement). Describe comparability of assessment methods if there is more than one group | 6       |
| Bias                         | 9       | Describe any efforts to address potential sources of bias                                                                                                                            | n.a.    |
| Study size                   | 10      | Explain how the study size was arrived at                                                                                                                                            | 6       |
| Quantitative variables       | 11      | Explain how quantitative variables were handled in the analyses. If applicable, describe which groupings were chosen and why                                                         | 8       |
| Statistical methods          | 12      | (a) Describe all statistical methods, including those used to control for confounding                                                                                                | 8       |
|                              |         | (b) Describe any methods used to examine subgroups and interactions                                                                                                                  | 8–9     |
|                              |         | (c) Explain how missing data were addressed                                                                                                                                          | 6       |

|                   | <b>Item No</b> | <b>Recommendation</b>                                                                                                                                                                                        | <b>Page No</b>      |
|-------------------|----------------|--------------------------------------------------------------------------------------------------------------------------------------------------------------------------------------------------------------|---------------------|
|                   |                | (d) If applicable, describe analytical methods taking account of sampling strategy                                                                                                                           | n.a.                |
|                   |                | (e) Describe any sensitivity analyses                                                                                                                                                                        | n.a.                |
| <b>Results</b>    |                |                                                                                                                                                                                                              |                     |
| Participants      | 13*            | (a) Report numbers of individuals at each stage of study—eg numbers potentially eligible, examined for eligibility, confirmed eligible, included in the study, completing follow-up, and analysed            | 6                   |
|                   |                | (b) Give reasons for non-participation at each stage                                                                                                                                                         | n.a.                |
|                   |                | (c) Consider use of a flow diagram                                                                                                                                                                           | n.a.                |
| Descriptive data  | 14*            | (a) Give characteristics of study participants (eg demographic, clinical, social) and information on exposures and potential confounders                                                                     | 9 if applicable     |
|                   |                | (b) Indicate number of participants with missing data for each variable of interest                                                                                                                          | n.a.                |
| Outcome data      | 15*            | Report numbers of outcome events or summary measures                                                                                                                                                         | n.a.                |
| Main results      | 16             | (a) Give unadjusted estimates and, if applicable, confounder-adjusted estimates and their precision (eg, 95% confidence interval). Make clear which confounders were adjusted for and why they were included | 9–16,<br>Figure 1–3 |
|                   |                | (b) Report category boundaries when continuous variables were categorized                                                                                                                                    | n.a.                |
|                   |                | (c) If relevant, consider translating estimates of relative risk into absolute risk for a meaningful time period                                                                                             | n.a.                |
| Other analyses    | 17             | Report other analyses done—eg analyses of subgroups and interactions, and sensitivity analyses                                                                                                               | n.a.                |
| <b>Discussion</b> |                |                                                                                                                                                                                                              |                     |
| Key results       | 18             | Summarise key results with reference to study objectives                                                                                                                                                     | 16                  |
| Limitations       | 19             | Discuss limitations of the study, taking into account sources of potential bias or imprecision. Discuss both direction and magnitude of any potential bias                                                   | 17                  |
| Interpretation    | 20             | Give a cautious overall interpretation of results considering objectives, limitations, multiplicity of analyses, results from similar studies, and other relevant evidence                                   | 17–18               |

|                          | <b>Item No</b> | <b>Recommendation</b>                                                                                                                                         | <b>Page No</b> |
|--------------------------|----------------|---------------------------------------------------------------------------------------------------------------------------------------------------------------|----------------|
| Generalisability         | 21             | Discuss the generalisability (external validity) of the study results                                                                                         | 17–18          |
| <b>Other information</b> |                |                                                                                                                                                               |                |
| Funding                  | 22             | Give the source of funding and the role of the funders for the present study and, if applicable, for the original study on which the present article is based | 18             |

SOURCE: An Explanation and Elaboration article discusses each checklist item and gives methodological background and published examples of transparent reporting. The STROBE checklist is best used in conjunction with this article (freely available on the Web sites of PLoS Medicine at <http://www.plosmedicine.org/>, Annals of Internal Medicine at <http://www.annals.org/>, and Epidemiology at <http://www.epidem.com/>). Information on the STROBE Initiative is available at [www.strobe-statement.org](http://www.strobe-statement.org). NOTES: \*Give information separately for exposed and unexposed groups.

**Exhibit A2. Selected cause of death categories and ICD-10 codes included in each category.**

| <b>Cause category</b>                      | <b>ICD-10 codes</b>                                                                                                                                          | <b>AAF*</b> |
|--------------------------------------------|--------------------------------------------------------------------------------------------------------------------------------------------------------------|-------------|
| Alcohol use disorders                      | F10-F10.9, G31.2, G62.1, G72.1, I42.6, K29.2, Q86.0, R78.0, X45-X45.9, Y15-Y15.9                                                                             | 100%        |
| Liver disease and cirrhosis                | K70, K71.3-K71.5, K71.7, K72-K74                                                                                                                             | 63%         |
| Pancreatitis                               | Acute pancreatitis: K85.0, K85.1, K85.2, K85.8, K85.9                                                                                                        | 29%         |
|                                            | Chronic pancreatitis: K86.0-K86.99                                                                                                                           | 35%         |
| Motor vehicle accidents                    | V02-V04, V09.0, V09.2, V12-V14, V19.0-V19.2, V19.4-V19.6, V20-V79, V80.3-V80.5, V81.0-V81.1, V82.0-V82.1, V83-V86, V87.0-V87.8, V88.0-V88.8, V89.0 and V89.2 | 30%         |
| Other unintentional injuries               | V01-X59, Y40-Y86, Y88-Y89 excluding X41, X42, X44, X45† and motor vehicle accidents                                                                          | 20%         |
| Suicide                                    | X60-X84, Y87.0                                                                                                                                               | 20%         |
| Cancer                                     | Breast cancer: C50                                                                                                                                           | 6%          |
|                                            | Pancreatic cancer: C25                                                                                                                                       | 6%          |
|                                            | Colorectal cancer: C18-C21                                                                                                                                   | 13%         |
|                                            | Esophageal cancer: C15                                                                                                                                       | 16%         |
|                                            | Laryngeal cancer: C32                                                                                                                                        | 20%         |
|                                            | Liver cancer: C22                                                                                                                                            | 24%         |
|                                            | Oral cavity and pharynx cancer: C00-C08, C09-C10, C12-C14                                                                                                    | 32%         |
| Hemorrhagic stroke                         | I60-I62.9, I67.0-I67.1, I69.0-I69.298                                                                                                                        | 16%         |
| Hypertensive heart disease                 | I11                                                                                                                                                          | 12%         |
| Ischemic heart disease and ischemic stroke | Ischemic heart disease: I20-I25                                                                                                                              | 2%          |
|                                            | Ischemic stroke: G45-G46.8, I63-I63.9, I65-I66.9, I67.2-I67.848, I69.3-I69.4                                                                                 | -6%         |
| Diabetes mellitus                          | E10-E14                                                                                                                                                      | -4%         |
| Lower respiratory infections: pneumonia    | A48.1, A70, J09-J15.8, J16-J16.9, J20-J21.9, P23.0-P23.4                                                                                                     | 6%          |

SOURCE: AAFs were obtained from InterMAHP (20, 21) using alcohol exposure data for the year 2018 from Manthey et al. (2010) (55), using the methodology described in Shield et al. (2020) (14).

NOTES: AAF Alcohol-attributable fraction. Negative AAFs denote an overall beneficial impact of alcohol on the causes of death. † X45 is included under alcohol use disorders.

**Exhibit A3. Proportion of men and women (18+) with low, middle and high educational attainment as indicator of socioeconomic status in the United States between 2000 and 2018.**

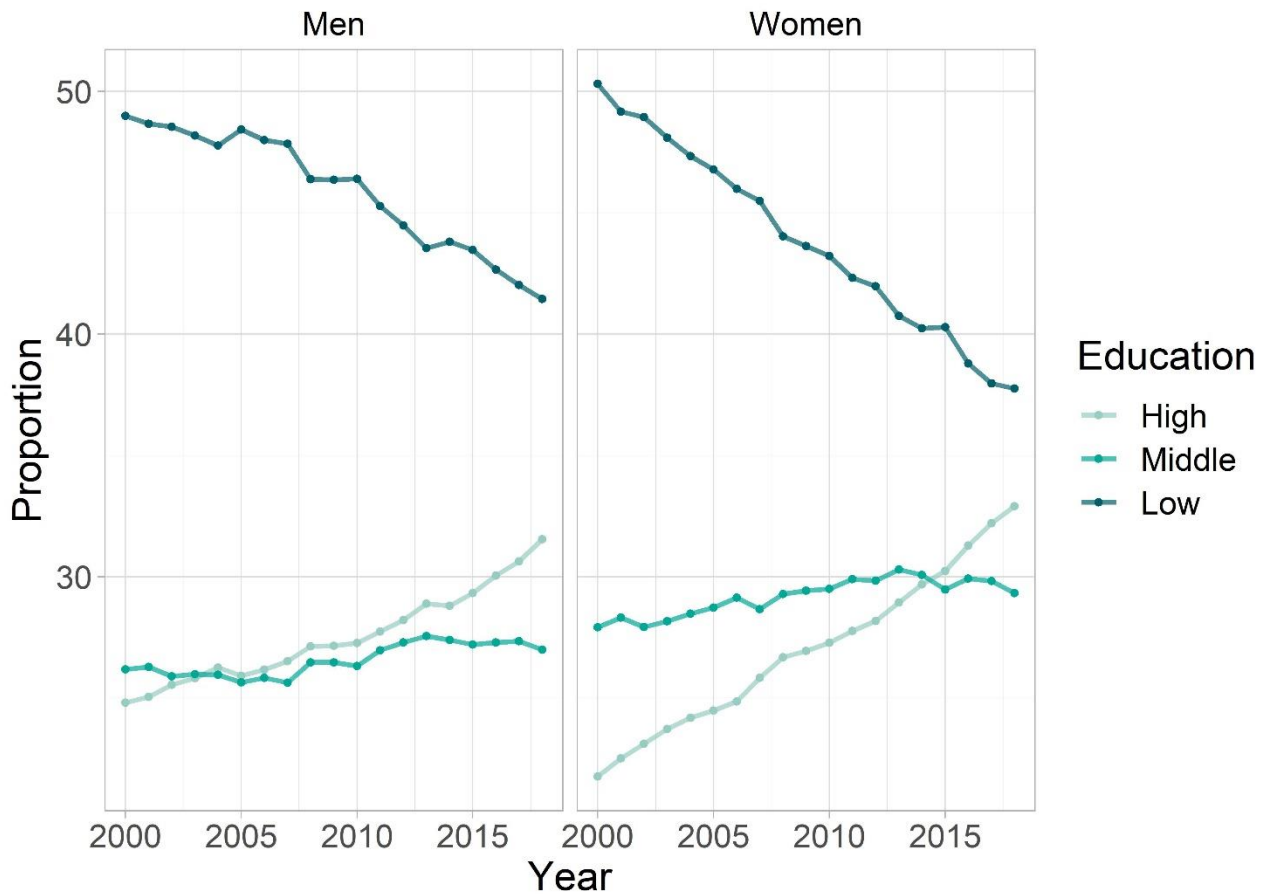

SOURCE: Authors' analysis of population data from Current Population Surveys. The coding of education on death certificates was revised in 2003. The 1989 classification of education (used until 2002) specified completed years of elementary, high school, and college education. From 2003 onwards the classification was revised to code education as educational attainment (e.g., 9–12th grade or Bachelor's degree). We harmonized entries using categories that were consistent throughout the whole observation period.

**Exhibit A4. Age-standardized mortality rates among men (18+) in the United States between 2000 and 2018 by cause of death, sex, and educational attainment as indicator of socioeconomic status (SES). Standardized to population counts in 2018.**

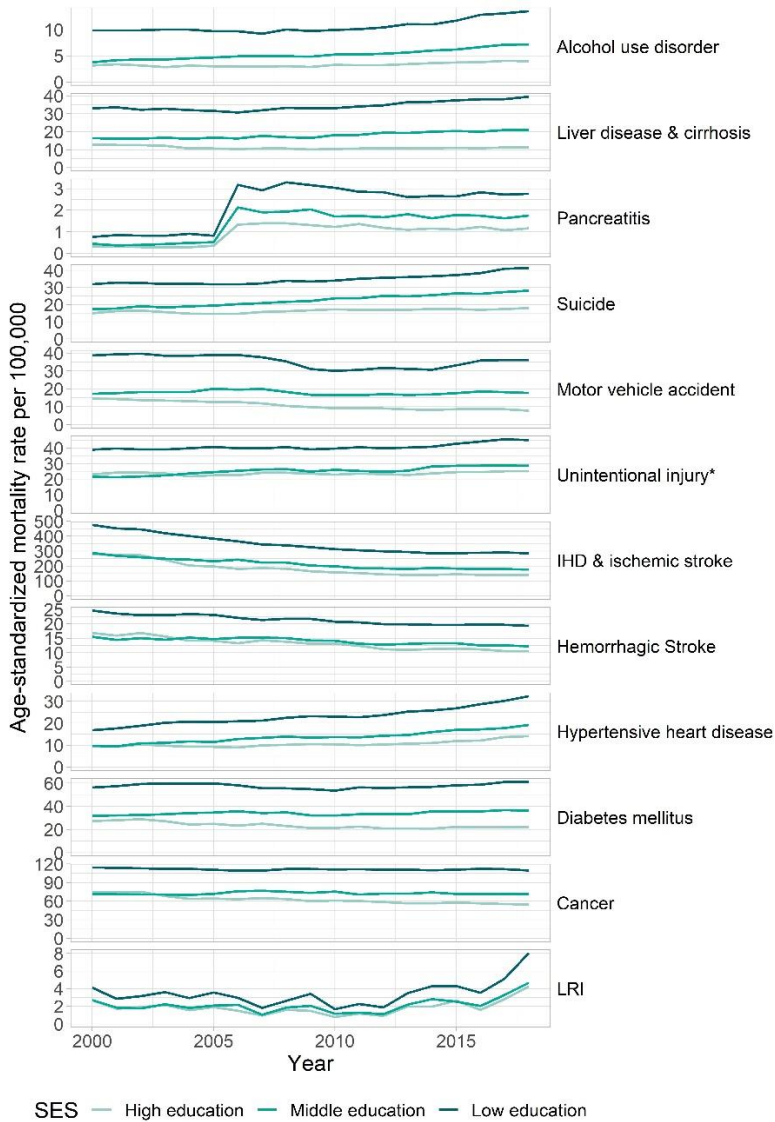

SOURCE: Authors' analysis of data on mortality from the National Vital Statistics System and on the population from Current Population Surveys.



**Exhibit A5. Age-standardized mortality rates among women (18+) in the United States between 2000 and 2018 by cause of death, sex, and educational attainment as indicator of socioeconomic status (SES). Standardized to population counts in 2018.**

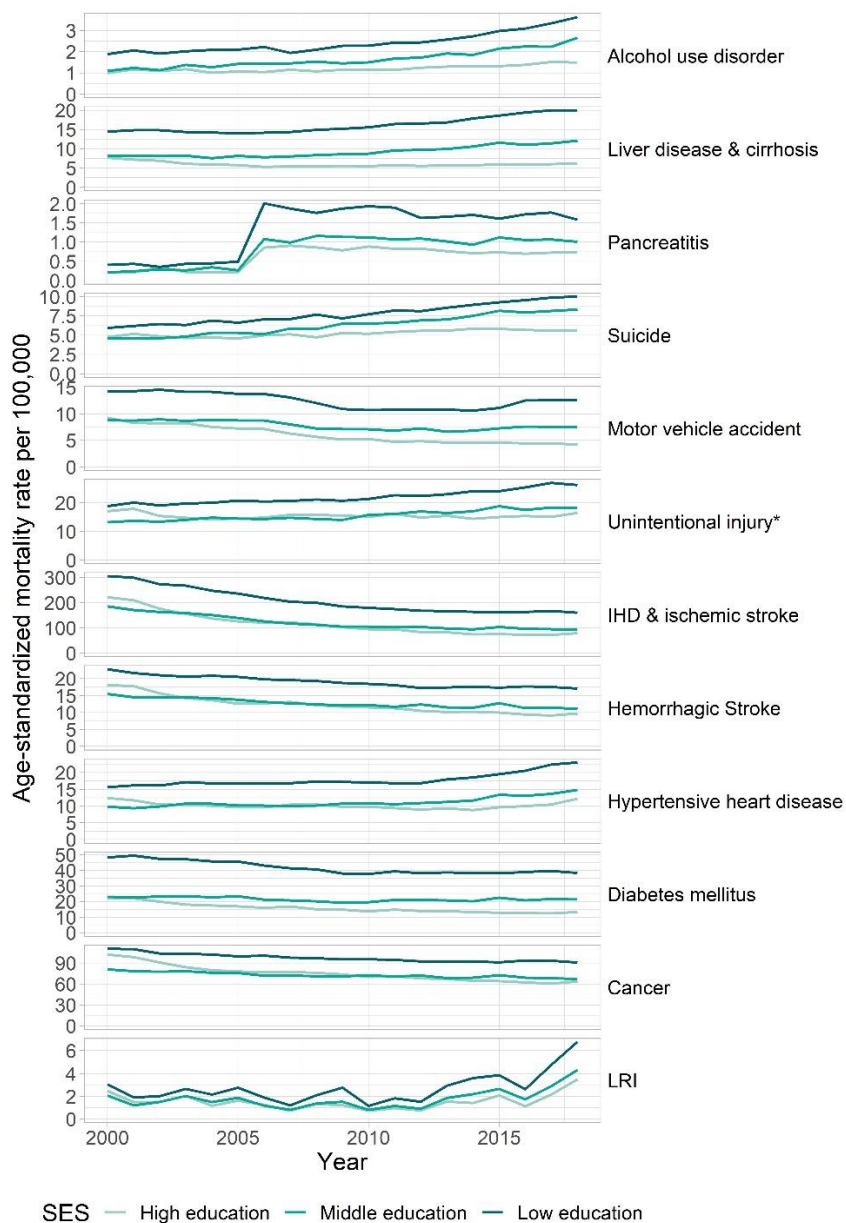

SOURCE: Authors' analysis of data on mortality from the National Vital Statistics System and on the population from Current Population Surveys.

**Exhibit A6. Cause-specific contributions (in years) to annual changes in life expectancy among US adult men and women by educational attainment as an indicator of socioeconomic status 2000-2018.**

| Years                      | High education |             |              |             | Middle education |             |              |             | Low education |             |              |              |
|----------------------------|----------------|-------------|--------------|-------------|------------------|-------------|--------------|-------------|---------------|-------------|--------------|--------------|
|                            | 2000-2005      | 2005-2010   | 2010-2015    | 2015-2018   | 2000-2005        | 2005-2010   | 2010-2015    | 2015-2018   | 2000-2005     | 2005-2010   | 2010-2015    | 2015-2018    |
| <b>Men</b>                 |                |             |              |             |                  |             |              |             |               |             |              |              |
| Alcohol use disorder       | 0.00           | 0.00        | -0.01        | -0.01       | -0.01            | -0.01       | -0.02        | -0.01       | 0.00          | 0.00        | -0.02        | -0.02        |
| Liver disease & cirrhosis  | 0.03           | 0.00        | -0.01        | -0.01       | 0.00             | -0.02       | -0.03        | -0.01       | 0.03          | -0.01       | -0.04        | -0.02        |
| Pancreatitis               | 0.00           | -0.01       | 0.00         | 0.00        | 0.00             | -0.02       | 0.00         | 0.00        | 0.00          | -0.02       | 0.00         | 0.00         |
| Suicide                    | 0.01           | -0.06       | 0.00         | -0.02       | -0.04            | -0.09       | -0.06        | -0.04       | 0.00          | -0.03       | -0.06        | -0.08        |
| Motor vehicle accident     | 0.03           | 0.08        | 0.02         | 0.02        | -0.06            | 0.08        | -0.03        | 0.01        | 0.00          | 0.18        | -0.05        | -0.05        |
| Unintent. injury*          | 0.02           | 0.01        | -0.02        | -0.01       | -0.04            | -0.01       | -0.04        | 0.00        | 0.01          | 0.04        | -0.02        | -0.02        |
| IHD & ischemic stroke      | 0.98           | 0.59        | 0.18         | 0.05        | 0.67             | 0.39        | 0.22         | 0.11        | 0.54          | 0.45        | 0.18         | -0.01        |
| Hemorrhagic Stroke         | 0.04           | 0.01        | 0.02         | 0.01        | 0.01             | 0.01        | 0.01         | 0.01        | 0.02          | 0.02        | 0.01         | 0.00         |
| Hypertensive heart disease | 0.00           | -0.02       | -0.03        | -0.04       | -0.03            | -0.03       | -0.05        | -0.03       | -0.03         | -0.02       | -0.03        | -0.04        |
| Diabetes mellitus          | 0.03           | 0.05        | -0.02        | 0.00        | -0.04            | 0.03        | -0.05        | 0.00        | -0.02         | 0.04        | -0.04        | -0.04        |
| Cancer                     | 0.13           | 0.04        | 0.05         | 0.04        | -0.01            | -0.05       | 0.05         | 0.01        | 0.02          | -0.01       | 0.00         | 0.01         |
| LRI                        | 0.01           | 0.02        | -0.03        | -0.03       | 0.01             | 0.01        | -0.02        | -0.03       | 0.00          | 0.01        | -0.02        | -0.03        |
| Rest                       | 1.17           | 0.32        | -0.23        | 0.28        | 0.05             | -0.25       | -0.18        | 0.54        | 0.23          | 0.31        | -0.35        | -0.30        |
| <i>Total</i>               | <i>2.45</i>    | <i>1.02</i> | <i>-0.07</i> | <i>0.31</i> | <i>0.51</i>      | <i>0.04</i> | <i>-0.20</i> | <i>0.56</i> | <i>0.80</i>   | <i>0.97</i> | <i>-0.44</i> | <i>-0.59</i> |
| <b>Women</b>               |                |             |              |             |                  |             |              |             |               |             |              |              |
| Alcohol use disorder       | 0.00           | 0.00        | 0.00         | 0.00        | -0.01            | 0.00        | -0.01        | -0.01       | 0.00          | 0.00        | -0.01        | -0.01        |
| Liver disease & cirrhosis  | 0.03           | 0.00        | -0.01        | 0.00        | 0.00             | -0.01       | -0.06        | -0.01       | 0.00          | -0.02       | -0.04        | -0.02        |
| Pancreatitis               | 0.00           | -0.01       | 0.00         | 0.00        | 0.00             | -0.02       | 0.00         | 0.00        | 0.00          | -0.01       | 0.00         | 0.00         |
| Suicide                    | 0.00           | -0.01       | -0.01        | 0.00        | -0.02            | -0.03       | -0.04        | -0.01       | -0.01         | -0.02       | -0.03        | -0.02        |
| Motor vehicle accident     | 0.03           | 0.04        | 0.02         | 0.01        | 0.00             | 0.04        | -0.01        | 0.00        | 0.00          | 0.07        | -0.01        | -0.03        |

| Years                      | High education |             |             |              | Middle education |             |              |             | Low education |             |              |              |
|----------------------------|----------------|-------------|-------------|--------------|------------------|-------------|--------------|-------------|---------------|-------------|--------------|--------------|
|                            | 2000-2005      | 2005-2010   | 2010-2015   | 2015-2018    | 2000-2005        | 2005-2010   | 2010-2015    | 2015-2018   | 2000-2005     | 2005-2010   | 2010-2015    | 2015-2018    |
| Uninten. injury*           | 0.03           | -0.01       | 0.00        | -0.04        | -0.02            | -0.03       | -0.06        | 0.02        | -0.02         | 0.00        | -0.03        | -0.02        |
| IHD & ischemic stroke      | 1.22           | 0.52        | 0.44        | -0.10        | 0.72             | 0.68        | 0.05         | 0.21        | 0.52          | 0.50        | 0.16         | 0.01         |
| Hemorrhagic Stroke         | 0.07           | 0.02        | 0.03        | 0.00         | 0.03             | 0.03        | -0.01        | 0.03        | 0.02          | 0.03        | 0.01         | 0.00         |
| Hypertensive heart disease | 0.03           | 0.00        | 0.00        | -0.07        | -0.01            | -0.01       | -0.05        | -0.03       | -0.02         | -0.01       | -0.03        | -0.03        |
| Diabetes mellitus          | 0.06           | 0.05        | 0.03        | -0.01        | -0.01            | 0.07        | -0.05        | 0.02        | 0.02          | 0.07        | -0.01        | -0.01        |
| Cancer                     | 0.32           | 0.12        | 0.13        | -0.01        | 0.08             | 0.06        | -0.01        | 0.11        | 0.10          | 0.04        | 0.05         | 0.00         |
| LRI                        | 0.01           | 0.02        | -0.03       | -0.03        | 0.00             | 0.02        | -0.04        | -0.04       | 0.00          | 0.01        | -0.03        | -0.03        |
| Rest                       | 1.96           | 0.19        | 0.97        | -0.52        | 0.12             | 0.18        | -1.27        | 1.23        | -0.06         | 0.04        | -0.41        | -0.21        |
| <i>Total</i>               | <i>3.77</i>    | <i>0.92</i> | <i>1.56</i> | <i>-0.76</i> | <i>0.90</i>      | <i>0.98</i> | <i>-1.56</i> | <i>1.53</i> | <i>0.55</i>   | <i>0.70</i> | <i>-0.38</i> | <i>-0.38</i> |

SOURCE: Authors' analysis of mortality data from the National Vital Statistics System and population data from Current Population Surveys. NOTES: Contributions for all remaining causes are not shown. Low education = high school degree or less; middle education = some college but no college degree; and high education = college degree or more. \* Other than motor vehicle accidents. LRI lower respiratory infections.

## Appendix B

**Exhibit B1. Population counts and crude, cause-specific mortality rates per 100,000 population by sex, educational attainment, and year.**

| Year | Educational attainment | Sex   | N population | All causes | Liver disease & cirrhosis | Pancreatitis | Diabetes mellitus | Ischemic heart disease & ischemic stroke | Hemorrhagic stroke | Hypertensive heart disease | Alcohol use disorder | Unintentional injury* | Motor vehicle accident | Suicide | Cancer | Lower respiratory diseases | Rest   |
|------|------------------------|-------|--------------|------------|---------------------------|--------------|-------------------|------------------------------------------|--------------------|----------------------------|----------------------|-----------------------|------------------------|---------|--------|----------------------------|--------|
| 2000 | Low                    | Men   | 47469085     | 1735.2     | 29.1                      | 0.7          | 48.6              | 411.8                                    | 21.6               | 14.6                       | 9.0                  | 36.6                  | 40.2                   | 32.2    | 97.4   | 3.6                        | 990.0  |
| 2000 | Middle                 | Men   | 25380565     | 599.8      | 11.6                      | 0.3          | 16.7              | 136.5                                    | 8.3                | 5.5                        | 3.1                  | 14.0                  | 17.2                   | 16.1    | 38.2   | 1.3                        | 330.9  |
| 2000 | High                   | Men   | 24051503     | 711.4      | 10.4                      | 0.3          | 17.7              | 168.7                                    | 10.9               | 6.4                        | 2.9                  | 15.8                  | 12.1                   | 14.0    | 50.4   | 1.6                        | 400.3  |
| 2000 | Low                    | Women | 52758392     | 1726.7     | 15.5                      | 0.5          | 58.4              | 402.0                                    | 27.3               | 20.0                       | 1.9                  | 23.7                  | 14.8                   | 5.9     | 128.6  | 3.8                        | 1024.3 |
| 2000 | Middle                 | Women | 29274447     | 541.6      | 5.7                       | 0.2          | 14.2              | 106.6                                    | 10.0               | 5.9                        | 0.9                  | 8.4                   | 8.5                    | 4.5     | 51.7   | 1.2                        | 323.6  |
| 2000 | High                   | Women | 22828473     | 530.5      | 4.9                       | 0.1          | 11.1              | 100.2                                    | 9.7                | 5.8                        | 0.8                  | 8.9                   | 7.1                    | 4.6     | 59.1   | 1.2                        | 316.9  |
| 2001 | Low                    | Men   | 47739650     | 1719.6     | 29.5                      | 0.7          | 49.8              | 395.5                                    | 20.9               | 15.5                       | 9.0                  | 37.6                  | 41.0                   | 33.2    | 97.2   | 2.6                        | 987.2  |
| 2001 | Middle                 | Men   | 25790930     | 604.5      | 11.6                      | 0.3          | 17.5              | 133.3                                    | 8.1                | 5.7                        | 3.4                  | 13.9                  | 17.9                   | 16.6    | 38.9   | 1.0                        | 336.1  |
| 2001 | High                   | Men   | 24582142     | 718.2      | 10.2                      | 0.3          | 18.1              | 164.1                                    | 10.4               | 6.2                        | 3.2                  | 16.4                  | 11.6                   | 15.2    | 50.6   | 1.0                        | 410.5  |
| 2001 | Low                    | Women | 52047638     | 1750.9     | 16.0                      | 0.5          | 60.3              | 395.5                                    | 26.1               | 20.8                       | 2.1                  | 25.3                  | 14.8                   | 6.1     | 128.5  | 2.4                        | 1052.5 |
| 2001 | Middle                 | Women | 29982096     | 541.5      | 6.0                       | 0.2          | 14.3              | 101.5                                    | 9.6                | 5.9                        | 1.1                  | 9.0                   | 8.5                    | 4.5     | 51.5   | 0.8                        | 328.6  |
| 2001 | High                   | Women | 23845059     | 521.4      | 4.7                       | 0.1          | 11.2              | 95.5                                     | 9.4                | 5.6                        | 0.9                  | 9.1                   | 6.5                    | 5.0     | 57.4   | 0.8                        | 315.1  |
| 2002 | Low                    | Men   | 48883301     | 1690.5     | 28.6                      | 0.7          | 50.8              | 381.2                                    | 20.1               | 16.4                       | 9.1                  | 36.3                  | 41.4                   | 32.8    | 95.6   | 2.8                        | 974.9  |
| 2002 | Middle                 | Men   | 26082139     | 618.2      | 11.7                      | 0.3          | 18.1              | 133.9                                    | 8.5                | 6.8                        | 3.7                  | 14.6                  | 18.3                   | 17.8    | 40.0   | 0.9                        | 343.4  |
| 2002 | High                   | Men   | 25735693     | 704.7      | 10.2                      | 0.2          | 18.2              | 159.1                                    | 10.7               | 7.1                        | 3.0                  | 15.9                  | 11.4                   | 15.3    | 50.5   | 1.1                        | 401.7  |
| 2002 | Low                    | Women | 53221381     | 1717.1     | 16.1                      | 0.4          | 59.0              | 375.5                                    | 25.9               | 21.2                       | 1.9                  | 25.0                  | 15.1                   | 6.4     | 123.9  | 2.7                        | 1044.0 |
| 2002 | Middle                 | Women | 30383628     | 552.1      | 6.1                       | 0.2          | 15.0              | 99.0                                     | 9.8                | 6.3                        | 1.0                  | 8.9                   | 8.8                    | 4.7     | 51.7   | 1.0                        | 339.6  |
| 2002 | High                   | Women | 25148253     | 505.3      | 4.7                       | 0.2          | 11.1              | 89.2                                     | 9.0                | 5.6                        | 0.9                  | 8.7                   | 6.4                    | 4.8     | 56.7   | 0.8                        | 307.1  |
| 2003 | Low                    | Men   | 49350383     | 1671.5     | 28.8                      | 0.7          | 51.7              | 366.2                                    | 20.3               | 17.7                       | 9.2                  | 36.7                  | 40.0                   | 32.3    | 95.5   | 3.2                        | 969.2  |
| 2003 | Middle                 | Men   | 26622523     | 631.6      | 12.3                      | 0.3          | 19.0              | 134.1                                    | 8.6                | 7.3                        | 3.8                  | 15.4                  | 18.5                   | 17.1    | 40.9   | 1.2                        | 353.0  |
| 2003 | High                   | Men   | 26458486     | 685.9      | 10.3                      | 0.2          | 18.2              | 150.4                                    | 10.4               | 7.0                        | 2.8                  | 16.1                  | 11.1                   | 15.1    | 48.0   | 1.3                        | 394.8  |

| Year | Educational attainment | Sex   | N population | All causes | Liver disease & cirrhosis | Pancreatitis | Diabetes mellitus | Ischemic heart disease & ischemic stroke | Hemorrhagic stroke | Hypertensive heart disease | Alcohol use disorder | Unintentional injury* | Motor vehicle accident | Suicide | Cancer | Lower respiratory diseases | Rest   |
|------|------------------------|-------|--------------|------------|---------------------------|--------------|-------------------|------------------------------------------|--------------------|----------------------------|----------------------|-----------------------|------------------------|---------|--------|----------------------------|--------|
| 2003 | Low                    | Women | 52990177     | 1744.2     | 15.6                      | 0.5          | 59.0              | 370.6                                    | 25.5               | 22.7                       | 2.0                  | 26.0                  | 14.8                   | 6.3     | 124.3  | 3.5                        | 1073.4 |
| 2003 | Middle                 | Women | 31046308     | 562.0      | 6.1                       | 0.2          | 15.3              | 98.8                                     | 9.9                | 7.1                        | 1.2                  | 9.5                   | 8.6                    | 4.8     | 52.9   | 1.3                        | 346.3  |
| 2003 | High                   | Women | 26153700     | 491.1      | 4.4                       | 0.1          | 10.5              | 84.3                                     | 8.6                | 6.0                        | 1.0                  | 8.9                   | 6.5                    | 4.8     | 54.3   | 1.1                        | 300.4  |
| 2004 | Low                    | Men   | 49553967     | 1624.2     | 28.1                      | 0.8          | 50.7              | 343.4                                    | 20.4               | 18.0                       | 9.1                  | 37.0                  | 40.0                   | 32.5    | 94.1   | 2.6                        | 947.6  |
| 2004 | Middle                 | Men   | 26940324     | 630.6      | 12.0                      | 0.4          | 19.5              | 129.6                                    | 8.9                | 7.6                        | 3.9                  | 15.9                  | 18.4                   | 18.0    | 40.8   | 1.0                        | 354.6  |
| 2004 | High                   | Men   | 27252714     | 660.3      | 9.5                       | 0.3          | 17.7              | 139.1                                    | 10.3               | 7.3                        | 3.1                  | 16.1                  | 11.2                   | 14.1    | 48.2   | 1.0                        | 382.3  |
| 2004 | Low                    | Women | 52515887     | 1705.2     | 15.4                      | 0.6          | 57.8              | 346.5                                    | 26.0               | 22.6                       | 2.1                  | 26.7                  | 14.6                   | 6.9     | 123.1  | 2.8                        | 1060.2 |
| 2004 | Middle                 | Women | 31597569     | 551.6      | 5.8                       | 0.2          | 14.9              | 93.1                                     | 9.7                | 7.0                        | 1.1                  | 10.0                  | 8.9                    | 5.4     | 52.0   | 1.0                        | 342.4  |
| 2004 | High                   | Women | 26839745     | 472.4      | 4.3                       | 0.2          | 10.2              | 76.4                                     | 8.4                | 5.9                        | 0.9                  | 8.7                   | 6.2                    | 4.8     | 52.7   | 0.7                        | 292.9  |
| 2005 | Low                    | Men   | 50835545     | 1604.3     | 27.8                      | 0.7          | 50.8              | 328.3                                    | 20.1               | 17.9                       | 8.9                  | 37.8                  | 40.3                   | 32.0    | 92.5   | 3.1                        | 943.9  |
| 2005 | Middle                 | Men   | 26923012     | 662.4      | 12.9                      | 0.4          | 20.8              | 130.4                                    | 9.0                | 7.7                        | 4.1                  | 16.9                  | 20.2                   | 18.3    | 43.5   | 1.2                        | 377.0  |
| 2005 | High                   | Men   | 27207704     | 685.5      | 9.6                       | 0.3          | 18.6              | 140.9                                    | 10.5               | 7.5                        | 3.1                  | 17.3                  | 11.0                   | 14.4    | 49.8   | 1.3                        | 401.2  |
| 2005 | Low                    | Women | 52581445     | 1726.1     | 15.3                      | 0.6          | 58.2              | 335.3                                    | 26.0               | 23.2                       | 2.1                  | 28.0                  | 14.2                   | 6.6     | 121.4  | 3.8                        | 1091.6 |
| 2005 | Middle                 | Women | 32294243     | 565.3      | 6.3                       | 0.2          | 15.8              | 91.2                                     | 9.7                | 7.0                        | 1.3                  | 10.2                  | 8.7                    | 5.4     | 53.2   | 1.3                        | 355.0  |
| 2005 | High                   | Women | 27533189     | 475.7      | 4.2                       | 0.2          | 10.3              | 73.4                                     | 8.1                | 5.9                        | 1.0                  | 9.3                   | 6.0                    | 4.6     | 53.1   | 1.0                        | 298.6  |
| 2006 | Low                    | Men   | 51029100     | 1578.7     | 27.5                      | 2.8          | 49.7              | 313.1                                    | 19.4               | 18.4                       | 9.0                  | 37.0                  | 40.4                   | 32.1    | 92.3   | 2.6                        | 934.6  |
| 2006 | Middle                 | Men   | 27480695     | 661.6      | 12.3                      | 1.4          | 20.5              | 128.6                                    | 8.7                | 8.3                        | 4.4                  | 16.6                  | 19.9                   | 19.0    | 44.3   | 1.1                        | 376.6  |
| 2006 | High                   | Men   | 27835967     | 674.9      | 9.4                       | 1.1          | 17.9              | 133.3                                    | 10.1               | 7.3                        | 3.1                  | 17.3                  | 10.8                   | 14.5    | 50.0   | 1.1                        | 399.0  |
| 2006 | Low                    | Women | 52197312     | 1703.8     | 15.5                      | 2.6          | 54.9              | 314.7                                    | 25.2               | 23.2                       | 2.3                  | 27.9                  | 14.2                   | 6.9     | 122.5  | 2.5                        | 1091.6 |
| 2006 | Middle                 | Women | 33077450     | 556.5      | 6.3                       | 0.8          | 15.0              | 84.7                                     | 9.6                | 7.2                        | 1.3                  | 10.3                  | 8.7                    | 5.2     | 52.4   | 0.9                        | 354.1  |
| 2006 | High                   | Women | 28228924     | 466.6      | 4.1                       | 0.6          | 9.9               | 69.1                                     | 8.0                | 5.8                        | 1.0                  | 9.3                   | 5.9                    | 5.0     | 52.6   | 0.8                        | 294.7  |
| 2007 | Low                    | Men   | 51588062     | 1544.7     | 28.6                      | 2.6          | 47.6              | 295.1                                    | 18.7               | 18.6                       | 8.5                  | 36.6                  | 39.1                   | 32.6    | 92.3   | 1.6                        | 922.9  |
| 2007 | Middle                 | Men   | 27647642     | 676.0      | 13.8                      | 1.3          | 20.5              | 125.4                                    | 9.3                | 8.9                        | 4.4                  | 17.4                  | 20.3                   | 19.7    | 46.9   | 0.6                        | 387.5  |
| 2007 | High                   | Men   | 28607309     | 676.1      | 9.6                       | 1.1          | 18.2              | 128.8                                    | 10.2               | 7.7                        | 2.9                  | 17.5                  | 10.2                   | 15.2    | 49.1   | 0.7                        | 404.8  |

| Year | Educational attainment | Sex   | N population | All causes | Liver disease & cirrhosis | Pancreatitis | Diabetes mellitus | Ischemic heart disease & ischemic stroke | Hemorrhagic stroke | Hypertensive heart disease | Alcohol use disorder | Unintentional injury* | Motor vehicle accident | Suicide | Cancer | Lower respiratory diseases | Rest   |
|------|------------------------|-------|--------------|------------|---------------------------|--------------|-------------------|------------------------------------------|--------------------|----------------------------|----------------------|-----------------------|------------------------|---------|--------|----------------------------|--------|
| 2007 | Low                    | Women | 52259331     | 1681.0     | 15.6                      | 2.4          | 53.6              | 297.7                                    | 25.2               | 23.7                       | 2.0                  | 28.8                  | 13.4                   | 7.0     | 120.1  | 1.6                        | 1089.8 |
| 2007 | Middle                 | Women | 32939033     | 569.7      | 6.7                       | 0.8          | 15.1              | 82.7                                     | 9.5                | 7.5                        | 1.3                  | 11.0                  | 8.2                    | 6.0     | 54.1   | 0.6                        | 366.1  |
| 2007 | High                   | Women | 29681214     | 452.2      | 4.1                       | 0.6          | 9.7               | 63.2                                     | 7.7                | 5.7                        | 1.0                  | 9.0                   | 5.0                    | 5.1     | 51.0   | 0.5                        | 289.5  |
| 2008 | Low                    | Men   | 50493621     | 1597.4     | 29.9                      | 3.0          | 48.1              | 298.3                                    | 19.4               | 20.1                       | 9.4                  | 38.0                  | 36.3                   | 34.0    | 95.4   | 2.4                        | 963.1  |
| 2008 | Middle                 | Men   | 28826464     | 671.1      | 13.5                      | 1.3          | 20.8              | 122.0                                    | 8.9                | 9.2                        | 4.4                  | 17.1                  | 18.2                   | 20.4    | 46.6   | 1.0                        | 387.7  |
| 2008 | High                   | Men   | 29541552     | 679.0      | 9.9                       | 1.1          | 17.0              | 127.8                                    | 10.0               | 8.0                        | 3.1                  | 17.8                  | 9.1                    | 15.8    | 49.3   | 1.1                        | 408.8  |
| 2008 | Low                    | Women | 50995073     | 1749.7     | 16.4                      | 2.3          | 53.7              | 300.1                                    | 25.6               | 25.0                       | 2.1                  | 30.3                  | 12.4                   | 7.5     | 122.3  | 3.0                        | 1149.2 |
| 2008 | Middle                 | Women | 33930228     | 576.4      | 7.0                       | 0.9          | 14.9              | 81.5                                     | 9.4                | 7.7                        | 1.4                  | 10.9                  | 7.3                    | 5.9     | 53.6   | 1.1                        | 374.7  |
| 2008 | High                   | Women | 30916047     | 450.9      | 4.2                       | 0.6          | 8.9               | 61.5                                     | 7.3                | 5.9                        | 1.0                  | 9.2                   | 4.7                    | 4.8     | 51.4   | 0.8                        | 290.6  |
| 2009 | Low                    | Men   | 51006700     | 1549.9     | 29.9                      | 2.8          | 47.0              | 283.5                                    | 19.1               | 20.6                       | 9.1                  | 36.1                  | 31.8                   | 33.6    | 94.9   | 3.2                        | 938.2  |
| 2009 | Middle                 | Men   | 29134353     | 678.2      | 13.4                      | 1.5          | 20.5              | 120.6                                    | 9.0                | 9.4                        | 4.4                  | 17.0                  | 16.7                   | 21.2    | 47.6   | 1.6                        | 395.3  |
| 2009 | High                   | Men   | 29885089     | 686.0      | 9.7                       | 1.1          | 16.9              | 125.3                                    | 10.2               | 8.8                        | 2.9                  | 18.5                  | 8.7                    | 16.8    | 49.8   | 1.3                        | 415.8  |
| 2009 | Low                    | Women | 51025575     | 1692.5     | 16.8                      | 2.4          | 50.5              | 277.4                                    | 24.9               | 24.6                       | 2.3                  | 29.6                  | 11.2                   | 7.0     | 119.6  | 3.1                        | 1123.0 |
| 2009 | Middle                 | Women | 34409911     | 571.3      | 7.2                       | 0.9          | 14.3              | 77.1                                     | 9.3                | 8.3                        | 1.3                  | 10.8                  | 7.2                    | 6.5     | 53.9   | 1.3                        | 373.2  |
| 2009 | High                   | Women | 31511548     | 450.3      | 4.5                       | 0.5          | 9.3               | 58.4                                     | 7.5                | 5.9                        | 1.1                  | 9.5                   | 4.3                    | 5.4     | 52.2   | 1.0                        | 290.8  |
| 2010 | Low                    | Men   | 51578964     | 1537.3     | 30.2                      | 2.8          | 46.6              | 274.6                                    | 18.5               | 20.6                       | 9.4                  | 36.8                  | 30.5                   | 34.1    | 95.6   | 1.5                        | 936.2  |
| 2010 | Middle                 | Men   | 29259058     | 697.7      | 14.8                      | 1.3          | 20.7              | 120.3                                    | 9.1                | 9.7                        | 4.7                  | 18.0                  | 16.5                   | 22.8    | 50.1   | 0.8                        | 408.9  |
| 2010 | High                   | Men   | 30323658     | 701.7      | 10.1                      | 1.1          | 17.7              | 125.4                                    | 10.7               | 9.1                        | 3.5                  | 18.9                  | 8.4                    | 17.4    | 52.1   | 0.6                        | 426.8  |
| 2010 | Low                    | Women | 51030980     | 1702.2     | 17.1                      | 2.5          | 50.0              | 268.9                                    | 24.6               | 24.5                       | 2.3                  | 30.8                  | 11.1                   | 7.5     | 120.2  | 1.5                        | 1141.3 |
| 2010 | Middle                 | Women | 34835130     | 585.0      | 7.4                       | 0.9          | 14.7              | 77.0                                     | 9.3                | 8.3                        | 1.4                  | 12.1                  | 7.2                    | 6.5     | 55.6   | 0.6                        | 384.0  |
| 2010 | High                   | Women | 32212617     | 456.7      | 4.6                       | 0.6          | 9.0               | 57.1                                     | 7.6                | 6.3                        | 1.1                  | 9.7                   | 4.4                    | 5.4     | 51.8   | 0.5                        | 298.6  |
| 2011 | Low                    | Men   | 50847712     | 1574.0     | 31.5                      | 2.6          | 50.3              | 275.6                                    | 18.7               | 20.9                       | 9.7                  | 38.4                  | 31.2                   | 35.2    | 98.2   | 2.1                        | 959.6  |
| 2011 | Middle                 | Men   | 30298379     | 701.7      | 15.1                      | 1.3          | 22.6              | 119.0                                    | 8.9                | 10.0                       | 4.7                  | 18.4                  | 16.5                   | 22.9    | 49.4   | 0.9                        | 411.9  |
| 2011 | High                   | Men   | 31154581     | 706.0      | 10.3                      | 1.2          | 18.9              | 122.9                                    | 10.2               | 8.9                        | 3.3                  | 19.4                  | 8.2                    | 17.1    | 51.7   | 1.0                        | 433.0  |

| Year | Educational attainment | Sex   | N population | All causes | Liver disease & cirrhosis | Pancreatitis | Diabetes mellitus | Ischemic heart disease & ischemic stroke | Hemorrhagic stroke | Hypertensive heart disease | Alcohol use disorder | Unintentional injury* | Motor vehicle accident | Suicide | Cancer | Lower respiratory diseases | Rest   |
|------|------------------------|-------|--------------|------------|---------------------------|--------------|-------------------|------------------------------------------|--------------------|----------------------------|----------------------|-----------------------|------------------------|---------|--------|----------------------------|--------|
| 2011 | Low                    | Women | 50320770     | 1745.7     | 18.2                      | 2.5          | 52.7              | 265.1                                    | 24.4               | 24.4                       | 2.5                  | 33.1                  | 11.0                   | 7.9     | 120.6  | 2.4                        | 1180.9 |
| 2011 | Middle                 | Women | 35557893     | 598.2      | 8.2                       | 0.8          | 16.1              | 75.9                                     | 9.1                | 8.2                        | 1.6                  | 12.5                  | 6.9                    | 6.7     | 55.2   | 0.9                        | 396.0  |
| 2011 | High                   | Women | 33014450     | 463.8      | 4.8                       | 0.6          | 9.8               | 56.4                                     | 7.4                | 6.0                        | 1.1                  | 10.3                  | 3.9                    | 5.6     | 52.7   | 0.6                        | 304.4  |
| 2012 | Low                    | Men   | 50388035     | 1592.5     | 33.0                      | 2.7          | 50.8              | 274.1                                    | 18.5               | 22.2                       | 10.1                 | 38.0                  | 32.2                   | 35.7    | 100.2  | 1.7                        | 973.4  |
| 2012 | Middle                 | Men   | 30927127     | 715.7      | 16.1                      | 1.3          | 22.9              | 120.8                                    | 8.7                | 10.7                       | 4.9                  | 17.9                  | 17.1                   | 24.1    | 51.2   | 0.7                        | 419.1  |
| 2012 | High                   | Men   | 31964048     | 714.3      | 10.6                      | 1.1          | 18.3              | 122.2                                    | 9.6                | 9.4                        | 3.4                  | 19.9                  | 8.4                    | 17.2    | 52.6   | 0.8                        | 440.7  |
| 2012 | Low                    | Women | 50975256     | 1718.9     | 18.4                      | 2.2          | 51.4              | 254.4                                    | 23.5               | 24.4                       | 2.5                  | 32.7                  | 11.1                   | 7.9     | 118.5  | 2.1                        | 1170.0 |
| 2012 | Middle                 | Women | 36237547     | 604.5      | 8.4                       | 0.9          | 16.1              | 75.5                                     | 9.4                | 8.3                        | 1.6                  | 12.9                  | 7.3                    | 6.9     | 56.3   | 0.7                        | 400.1  |
| 2012 | High                   | Women | 34227388     | 462.6      | 4.7                       | 0.6          | 9.6               | 54.3                                     | 7.3                | 6.2                        | 1.2                  | 10.0                  | 4.1                    | 5.7     | 52.4   | 0.5                        | 305.7  |
| 2013 | Low                    | Men   | 49833880     | 1634.3     | 34.6                      | 2.5          | 52.4              | 277.2                                    | 18.8               | 24.0                       | 10.6                 | 39.2                  | 31.6                   | 36.0    | 101.6  | 3.4                        | 1002.4 |
| 2013 | Middle                 | Men   | 31541606     | 734.3      | 16.3                      | 1.4          | 23.7              | 121.6                                    | 9.2                | 11.1                       | 5.1                  | 18.8                  | 16.7                   | 23.8    | 52.5   | 1.5                        | 432.7  |
| 2013 | High                   | Men   | 33071523     | 721.1      | 10.9                      | 1.0          | 18.9              | 121.6                                    | 9.6                | 9.9                        | 3.6                  | 19.8                  | 8.0                    | 17.2    | 52.0   | 1.7                        | 446.7  |
| 2013 | Low                    | Women | 49910609     | 1769.7     | 18.9                      | 2.2          | 52.4              | 252.5                                    | 23.9               | 25.7                       | 2.6                  | 33.7                  | 11.1                   | 8.2     | 119.6  | 4.1                        | 1214.8 |
| 2013 | Middle                 | Women | 37120934     | 611.3      | 8.7                       | 0.8          | 16.4              | 74.1                                     | 9.1                | 8.9                        | 1.8                  | 12.8                  | 6.7                    | 7.0     | 55.3   | 1.5                        | 408.2  |
| 2013 | High                   | Women | 35450490     | 465.7      | 5.0                       | 0.5          | 9.8               | 53.9                                     | 7.1                | 6.4                        | 1.3                  | 10.5                  | 3.9                    | 5.7     | 52.3   | 1.1                        | 308.1  |
| 2014 | Low                    | Men   | 50754477     | 1616.7     | 35.1                      | 2.5          | 52.8              | 267.8                                    | 18.6               | 24.6                       | 10.7                 | 39.3                  | 31.1                   | 36.4    | 101.8  | 4.1                        | 991.8  |
| 2014 | Middle                 | Men   | 31750479     | 759.4      | 16.9                      | 1.3          | 25.1              | 124.0                                    | 9.2                | 12.0                       | 5.5                  | 20.2                  | 16.9                   | 24.4    | 54.0   | 2.1                        | 447.9  |
| 2014 | High                   | Men   | 33375127     | 735.2      | 11.0                      | 1.1          | 18.9              | 122.6                                    | 10.0               | 10.2                       | 3.8                  | 20.8                  | 7.7                    | 17.7    | 52.7   | 1.8                        | 457.0  |
| 2014 | Low                    | Women | 49673473     | 1766.5     | 20.1                      | 2.3          | 51.6              | 247.0                                    | 24.3               | 26.6                       | 2.8                  | 35.1                  | 10.8                   | 8.6     | 119.9  | 4.6                        | 1213.1 |
| 2014 | Middle                 | Women | 37133543     | 633.1      | 9.6                       | 0.8          | 16.6              | 74.4                                     | 9.3                | 9.5                        | 1.8                  | 13.6                  | 6.9                    | 7.5     | 57.7   | 1.8                        | 423.7  |
| 2014 | High                   | Women | 36653568     | 464.0      | 5.1                       | 0.5          | 9.8               | 51.5                                     | 7.5                | 6.4                        | 1.3                  | 10.3                  | 3.9                    | 6.0     | 51.9   | 1.1                        | 308.5  |
| 2015 | Low                    | Men   | 50879238     | 1654.7     | 36.2                      | 2.5          | 54.5              | 269.6                                    | 18.6               | 25.5                       | 11.4                 | 41.0                  | 33.3                   | 37.2    | 103.5  | 4.1                        | 1017.5 |



| Year | Educational attainment | Sex   | N population | All causes | Liver disease & cirrhosis | Pancreatitis | Diabetes mellitus | Ischemic heart disease & ischemic stroke | Hemorrhagic stroke | Hypertensive heart disease | Alcohol use disorder | Unintentional injury* | Motor vehicle accident | Suicide | Cancer | Lower respiratory diseases | Rest   |
|------|------------------------|-------|--------------|------------|---------------------------|--------------|-------------------|------------------------------------------|--------------------|----------------------------|----------------------|-----------------------|------------------------|---------|--------|----------------------------|--------|
| 2015 | Middle                 | Men   | 31846839     | 796.4      | 17.7                      | 1.4          | 26.6              | 127.3                                    | 9.6                | 13.1                       | 5.7                  | 21.1                  | 17.8                   | 25.6    | 55.3   | 1.7                        | 473.3  |
| 2015 | High                   | Men   | 34325033     | 746.4      | 11.1                      | 1.0          | 20.1              | 123.9                                    | 9.9                | 10.8                       | 4.0                  | 21.1                  | 8.1                    | 17.3    | 53.4   | 2.2                        | 463.4  |
| 2015 | Low                    | Women | 50433545     | 1776.3     | 20.6                      | 2.2          | 51.4              | 245.2                                    | 23.8               | 28.2                       | 2.9                  | 35.6                  | 11.3                   | 8.9     | 118.1  | 5.8                        | 1222.5 |
| 2015 | Middle                 | Women | 36902368     | 671.4      | 10.5                      | 0.9          | 18.4              | 79.0                                     | 10.1               | 10.5                       | 2.0                  | 14.5                  | 7.3                    | 8.1     | 60.4   | 2.0                        | 447.5  |
| 2015 | High                   | Women | 37861017     | 474.8      | 5.5                       | 0.6          | 9.8               | 53.4                                     | 7.5                | 7.1                        | 1.4                  | 10.9                  | 4.0                    | 6.0     | 52.9   | 1.5                        | 314.2  |
| 2016 | Low                    | Men   | 50526680     | 1688.0     | 36.5                      | 2.7          | 55.0              | 271.6                                    | 18.7               | 27.3                       | 12.4                 | 42.4                  | 36.0                   | 38.3    | 104.7  | 3.3                        | 1039.0 |
| 2016 | Middle                 | Men   | 32345342     | 807.6      | 17.7                      | 1.5          | 27.3              | 129.2                                    | 9.3                | 13.6                       | 6.2                  | 21.8                  | 18.6                   | 25.6    | 56.6   | 1.6                        | 478.7  |
| 2016 | High                   | Men   | 35595402     | 743.0      | 11.0                      | 1.2          | 20.0              | 123.2                                    | 9.8                | 11.2                       | 4.0                  | 21.4                  | 8.1                    | 17.0    | 53.1   | 1.4                        | 461.3  |
| 2016 | Low                    | Women | 49008561     | 1815.3     | 21.6                      | 2.3          | 52.3              | 247.2                                    | 24.4               | 29.6                       | 3.1                  | 37.5                  | 12.6                   | 9.1     | 121.8  | 3.4                        | 1250.7 |
| 2016 | Middle                 | Women | 37804914     | 667.5      | 10.2                      | 0.9          | 17.9              | 78.7                                     | 9.5                | 10.9                       | 2.2                  | 14.4                  | 7.7                    | 7.9     | 60.2   | 1.5                        | 445.5  |
| 2016 | High                   | Women | 39525644     | 470.6      | 5.4                       | 0.5          | 9.8               | 52.4                                     | 7.1                | 7.4                        | 1.4                  | 11.4                  | 3.9                    | 5.8     | 52.0   | 0.9                        | 312.4  |
| 2017 | Low                    | Men   | 50072490     | 1733.9     | 37.1                      | 2.6          | 58.3              | 279.6                                    | 19.0               | 29.2                       | 12.8                 | 44.5                  | 36.4                   | 40.8    | 106.3  | 5.0                        | 1062.3 |
| 2017 | Middle                 | Men   | 32590977     | 833.3      | 18.3                      | 1.4          | 29.1              | 134.7                                    | 9.7                | 14.2                       | 6.5                  | 22.7                  | 18.1                   | 26.8    | 57.9   | 2.4                        | 491.6  |
| 2017 | High                   | Men   | 36506193     | 761.2      | 11.5                      | 1.1          | 20.8              | 124.8                                    | 9.6                | 12.8                       | 4.3                  | 22.5                  | 8.2                    | 17.4    | 53.8   | 2.5                        | 471.8  |
| 2017 | Low                    | Women | 48280357     | 1864.5     | 22.4                      | 2.4          | 53.4              | 253.7                                    | 24.3               | 32.7                       | 3.3                  | 39.6                  | 12.6                   | 9.3     | 122.6  | 6.9                        | 1281.4 |
| 2017 | Middle                 | Women | 37924137     | 693.6      | 10.6                      | 0.9          | 19.4              | 82.1                                     | 10.0               | 11.9                       | 2.1                  | 16.0                  | 7.6                    | 8.0     | 61.3   | 2.5                        | 461.1  |
| 2017 | High                   | Women | 40950845     | 478.1      | 5.7                       | 0.6          | 10.0              | 53.8                                     | 7.2                | 8.0                        | 1.5                  | 11.5                  | 4.0                    | 5.7     | 52.0   | 1.6                        | 316.4  |
| 2018 | Low                    | Men   | 50032750     | 1747.8     | 38.4                      | 2.7          | 59.7              | 281.6                                    | 19.0               | 31.8                       | 13.2                 | 44.7                  | 36.3                   | 41.2    | 106.3  | 8.0                        | 1065.1 |
| 2018 | Middle                 | Men   | 32585450     | 851.1      | 18.8                      | 1.5          | 29.8              | 137.7                                    | 9.7                | 15.8                       | 6.7                  | 23.1                  | 17.5                   | 27.5    | 59.5   | 3.6                        | 500.0  |
| 2018 | High                   | Men   | 38087267     | 750.7      | 11.5                      | 1.1          | 20.9              | 124.9                                    | 9.5                | 12.8                       | 4.2                  | 22.3                  | 7.4                    | 18.0    | 52.4   | 3.6                        | 461.9  |
| 2018 | Low                    | Women | 48508513     | 1847.1     | 22.5                      | 2.1          | 52.9              | 250.5                                    | 24.1               | 35.0                       | 3.6                  | 39.4                  | 12.6                   | 9.4     | 121.9  | 10.0                       | 1263.3 |
| 2018 | Middle                 | Women | 37692192     | 709.2      | 11.4                      | 0.9          | 19.6              | 84.1                                     | 10.1               | 13.3                       | 2.5                  | 16.3                  | 7.6                    | 8.2     | 62.4   | 3.9                        | 468.8  |
| 2018 | High                   | Women | 42286921     | 479.1      | 5.7                       | 0.6          | 10.2              | 53.9                                     | 7.1                | 8.4                        | 1.5                  | 11.6                  | 3.7                    | 5.7     | 52.2   | 2.5                        | 315.9  |

**Exhibit B2. Cause-specific contributions (in years) to annual changes in life expectancy at age 18 among US adult men and women by educational attainment as an indicator of socioeconomic status, 2000-2018. Low education = high school degree or less; middle education = some college but no college degree; and high education = college degree or more.**

| Years     | Cause of death             | Absolute increase/decrease in the life expectancy gap in years† |                                |                                   |                                | Percent contribution to total increases/decreases in the life expectancy gap |                                |                                   |                                |
|-----------|----------------------------|-----------------------------------------------------------------|--------------------------------|-----------------------------------|--------------------------------|------------------------------------------------------------------------------|--------------------------------|-----------------------------------|--------------------------------|
|           |                            | Men                                                             |                                | Women                             |                                | Men                                                                          |                                | Women                             |                                |
|           |                            | Middle compared to high education                               | Low compared to high education | Middle compared to high education | Low compared to high education | Middle compared to high education                                            | Low compared to high education | Middle compared to high education | Low compared to high education |
| 2000-2005 | Alcohol use disorder       | 0.015                                                           | -0.004                         | 0.006                             | 0.002                          | 0.8%                                                                         | -0.2%                          | 0.2%                              | 0.1%                           |
|           | Liver disease & cirrhosis  | 0.034                                                           | 0.003                          | 0.027                             | 0.024                          | 1.8%                                                                         | 0.2%                           | 0.9%                              | 0.8%                           |
|           | Pancreatitis               | 0.001                                                           | -0.001                         | 0.001                             | 0.001                          | 0.0%                                                                         | -0.1%                          | 0.0%                              | 0.0%                           |
|           | Suicide                    | 0.046                                                           | 0.003                          | 0.017                             | 0.015                          | 2.4%                                                                         | 0.2%                           | 0.6%                              | 0.5%                           |
|           | Motor vehicle accident     | 0.093                                                           | 0.034                          | 0.037                             | 0.030                          | 4.8%                                                                         | 2.0%                           | 1.3%                              | 0.9%                           |
|           | Unintentional injury*      | 0.065                                                           | 0.016                          | 0.055                             | 0.054                          | 3.3%                                                                         | 1.0%                           | 1.9%                              | 1.7%                           |
|           | IHD & ischemic stroke      | 0.312                                                           | 0.446                          | 0.496                             | 0.695                          | 16.1%                                                                        | 27.0%                          | 17.3%                             | 21.6%                          |
|           | Hypertensive heart disease | 0.030                                                           | 0.036                          | 0.037                             | 0.046                          | 1.5%                                                                         | 2.2%                           | 1.3%                              | 1.4%                           |
|           | Hemorrhagic stroke         | 0.025                                                           | 0.020                          | 0.045                             | 0.055                          | 1.3%                                                                         | 1.2%                           | 1.6%                              | 1.7%                           |
|           | LRI                        | 0.000                                                           | 0.004                          | 0.004                             | 0.005                          | 0.0%                                                                         | 0.3%                           | 0.2%                              | 0.2%                           |
|           | Cancer                     | 0.130                                                           | 0.102                          | 0.234                             | 0.215                          | 6.7%                                                                         | 6.2%                           | 8.1%                              | 6.7%                           |
|           | Diabetes mellitus          | 0.070                                                           | 0.054                          | 0.071                             | 0.044                          | 3.6%                                                                         | 3.3%                           | 2.5%                              | 1.4%                           |
|           | Rest                       | 1.115                                                           | 0.938                          | 1.841                             | 2.025                          | 57.6%                                                                        | 56.8%                          | 64.1%                             | 63.0%                          |
|           | Total                      | 1.936                                                           | 1.652                          | 2.870                             | 3.212                          | 100.0%                                                                       | 100.0%                         | 100.0%                            | 100.0%                         |
| 2005-2010 | Alcohol use disorder       | 0.004                                                           | -0.003                         | 0.001                             | 0.003                          | 0.4%                                                                         | -5.8%                          | -1.1%                             | 1.1%                           |
|           | Liver disease & cirrhosis  | 0.023                                                           | 0.015                          | 0.013                             | 0.026                          | 2.3%                                                                         | 28.0%                          | -21.4%                            | 11.6%                          |

|               |                               | Absolute increase/decrease in the life expectancy gap<br>in yearst |                                      |                                            |                                         | Percent contribution to total<br>increases/decreases in the life expectancy gap |                                         |                                            |                                         |
|---------------|-------------------------------|--------------------------------------------------------------------|--------------------------------------|--------------------------------------------|-----------------------------------------|---------------------------------------------------------------------------------|-----------------------------------------|--------------------------------------------|-----------------------------------------|
|               |                               | Men                                                                |                                      | Women                                      |                                         | Men                                                                             |                                         | Women                                      |                                         |
| Years         | Cause of death                | Middle<br>compared<br>to high<br>education                         | Low compared<br>to high<br>education | Middle<br>compared to<br>high<br>education | Low<br>compared to<br>high<br>education | Middle<br>compared<br>to high<br>education                                      | Low<br>compared<br>to high<br>education | Middle<br>compared<br>to high<br>education | Low<br>compared<br>to high<br>education |
|               | Pancreatitis                  | 0.003                                                              | 0.007                                | 0.003                                      | 0.003                                   | 0.3%                                                                            | 12.9%                                   | -5.2%                                      | 1.3%                                    |
|               | Suicide                       | 0.032                                                              | -0.032                               | 0.016                                      | 0.008                                   | 3.2%                                                                            | -57.6%                                  | -25.6%                                     | 3.5%                                    |
|               | Motor vehicle<br>accident     | -0.001                                                             | -0.106                               | 0.007                                      | -0.022                                  | -0.1%                                                                           | -191.7%                                 | -11.2%                                     | -9.7%                                   |
|               | Unintentional<br>injury*      | 0.018                                                              | -0.038                               | 0.017                                      | -0.009                                  | 1.8%                                                                            | -69.2%                                  | -28.2%                                     | -3.9%                                   |
|               | IHD & ischemic<br>stroke      | 0.195                                                              | 0.140                                | -0.159                                     | 0.014                                   | 19.7%                                                                           | 254.3%                                  | 263.5%                                     | 6.3%                                    |
|               | Hypertensive<br>heart disease | 0.016                                                              | 0.007                                | 0.007                                      | 0.002                                   | 1.6%                                                                            | 12.4%                                   | -12.4%                                     | 0.9%                                    |
|               | Hemorrhagic<br>stroke         | 0.007                                                              | -0.008                               | -0.013                                     | -0.011                                  | 0.7%                                                                            | -14.5%                                  | 22.0%                                      | -5.1%                                   |
|               | LRI                           | 0.008                                                              | 0.007                                | -0.004                                     | 0.004                                   | 0.8%                                                                            | 12.8%                                   | 5.8%                                       | 1.6%                                    |
|               | Cancer                        | 0.095                                                              | 0.050                                | 0.060                                      | 0.081                                   | 9.6%                                                                            | 90.5%                                   | -98.6%                                     | 36.4%                                   |
|               | Diabetes<br>mellitus          | 0.017                                                              | 0.007                                | -0.017                                     | -0.024                                  | 1.8%                                                                            | 12.4%                                   | 28.4%                                      | -10.8%                                  |
|               | Rest                          | 0.574                                                              | 0.008                                | 0.010                                      | 0.148                                   | 58.1%                                                                           | 15.4%                                   | -16.1%                                     | 66.7%                                   |
|               | Total                         | 0.989                                                              | 0.055                                | -0.060                                     | 0.222                                   | 100.0%                                                                          | 100.0%                                  | 100.0%                                     | 100.0%                                  |
| 2010-<br>2015 | Alcohol use<br>disorder       | 0.009                                                              | 0.011                                | 0.008                                      | 0.008                                   | 6.7%                                                                            | 3.1%                                    | 0.3%                                       | 0.4%                                    |
|               | Liver disease &<br>cirrhosis  | 0.022                                                              | 0.030                                | 0.046                                      | 0.033                                   | 16.4%                                                                           | 8.0%                                    | 1.5%                                       | 1.7%                                    |
|               | Pancreatitis                  | 0.003                                                              | -0.002                               | 0.004                                      | 0.001                                   | 2.3%                                                                            | -0.6%                                   | 0.1%                                       | 0.0%                                    |
|               | Suicide                       | 0.066                                                              | 0.062                                | 0.025                                      | 0.017                                   | 50.2%                                                                           | 17.0%                                   | 0.8%                                       | 0.9%                                    |
|               | Motor vehicle<br>accident     | 0.048                                                              | 0.073                                | 0.021                                      | 0.025                                   | 36.5%                                                                           | 19.9%                                   | 0.7%                                       | 1.3%                                    |
|               | Unintentional<br>injury*      | 0.013                                                              | -0.007                               | 0.064                                      | 0.030                                   | 9.6%                                                                            | -2.0%                                   | 2.1%                                       | 1.6%                                    |
|               | IHD & ischemic<br>stroke      | -0.036                                                             | -0.001                               | 0.398                                      | 0.281                                   | -27.4%                                                                          | -0.3%                                   | 12.7%                                      | 14.5%                                   |
|               | Hypertensive<br>heart disease | 0.023                                                              | 0.009                                | 0.050                                      | 0.030                                   | 17.2%                                                                           | 2.3%                                    | 1.6%                                       | 1.5%                                    |
|               | Hemorrhagic<br>stroke         | 0.013                                                              | 0.014                                | 0.046                                      | 0.019                                   | 9.9%                                                                            | 3.9%                                    | 1.5%                                       | 1.0%                                    |
|               | LRI                           | -0.012                                                             | -0.014                               | 0.002                                      | -0.008                                  | -8.9%                                                                           | -3.9%                                   | 0.1%                                       | -0.4%                                   |

|           |                            | Absolute increase/decrease in the life expectancy gap in years† |                                |                                   |                                | Percent contribution to total increases/decreases in the life expectancy gap |                                |                                   |                                |
|-----------|----------------------------|-----------------------------------------------------------------|--------------------------------|-----------------------------------|--------------------------------|------------------------------------------------------------------------------|--------------------------------|-----------------------------------|--------------------------------|
|           |                            | Men                                                             |                                | Women                             |                                | Men                                                                          |                                | Women                             |                                |
| Years     | Cause of death             | Middle compared to high education                               | Low compared to high education | Middle compared to high education | Low compared to high education | Middle compared to high education                                            | Low compared to high education | Middle compared to high education | Low compared to high education |
|           | Cancer                     | -0.006                                                          | 0.043                          | 0.140                             | 0.080                          | -4.7%                                                                        | 11.8%                          | 4.5%                              | 4.1%                           |
|           | Diabetes mellitus          | 0.039                                                           | 0.028                          | 0.077                             | 0.040                          | 29.2%                                                                        | 7.5%                           | 2.5%                              | 2.1%                           |
|           | Rest                       | -0.049                                                          | 0.123                          | 2.244                             | 1.383                          | -37.0%                                                                       | 33.3%                          | 71.8%                             | 71.3%                          |
|           | Total                      | 0.132                                                           | 0.368                          | 3.124                             | 1.939                          | 100.0%                                                                       | 100.0%                         | 100.0%                            | 100.0%                         |
| 2015-2018 | Alcohol use disorder       | 0.008                                                           | 0.013                          | 0.009                             | 0.007                          | -3.3%                                                                        | 1.5%                           | -0.4%                             | -1.9%                          |
|           | Liver disease & cirrhosis  | 0.006                                                           | 0.013                          | 0.006                             | 0.015                          | -2.3%                                                                        | 1.4%                           | -0.2%                             | -4.0%                          |
|           | Pancreatitis               | -0.001                                                          | -0.001                         | -0.003                            | 0.000                          | 0.5%                                                                         | -0.1%                          | 0.1%                              | 0.1%                           |
|           | Suicide                    | 0.021                                                           | 0.061                          | 0.011                             | 0.024                          | -8.3%                                                                        | 6.8%                           | -0.5%                             | -6.2%                          |
|           | Motor vehicle accident     | 0.014                                                           | 0.069                          | 0.015                             | 0.047                          | -5.5%                                                                        | 7.6%                           | -0.7%                             | -12.5%                         |
|           | Unintentional injury*      | -0.011                                                          | 0.014                          | -0.054                            | -0.011                         | 4.5%                                                                         | 1.6%                           | 2.3%                              | 2.9%                           |
|           | IHD & ischemic stroke      | -0.063                                                          | 0.060                          | -0.312                            | -0.107                         | 24.9%                                                                        | 6.6%                           | 13.6%                             | 28.1%                          |
|           | Hypertensive heart disease | -0.005                                                          | 0.006                          | -0.036                            | -0.039                         | 1.8%                                                                         | 0.7%                           | 1.6%                              | 10.2%                          |
|           | Hemorrhagic stroke         | 0.000                                                           | 0.015                          | -0.029                            | 0.001                          | 0.0%                                                                         | 1.6%                           | 1.3%                              | -0.3%                          |
|           | LRI                        | 0.006                                                           | 0.005                          | 0.002                             | -0.002                         | -2.5%                                                                        | 0.6%                           | -0.1%                             | 0.5%                           |
|           | Cancer                     | 0.028                                                           | 0.033                          | -0.115                            | -0.009                         | -11.2%                                                                       | 3.7%                           | 5.0%                              | 2.4%                           |
|           | Diabetes mellitus          | 0.007                                                           | 0.037                          | -0.035                            | -0.002                         | -2.7%                                                                        | 4.1%                           | 1.5%                              | 0.6%                           |
|           | Rest                       | -0.262                                                          | 0.577                          | -1.750                            | -0.304                         | 104.1%                                                                       | 63.9%                          | 76.4%                             | 80.1%                          |
|           | Total                      | -0.252                                                          | 0.904                          | -2.291                            | -0.380                         | 100.0%                                                                       | 100.0%                         | 100.0%                            | 100.0%                         |

SOURCE: Authors' analysis of mortality data from the National Vital Statistics System and population

data from Current Population Surveys. NOTES: Low education = high school degree or less; middle

education = some college but no college degree; and high education = college degree or more. \* Other

than motor vehicle accidents. † A positive value indicates an increase in the differences in life expectancy between low/middle and high education. IHD ischemic heart disease. LRI lower respiratory infections.
